# Supplementary material for: Circulating Coding and Long Non-Coding RNAs as Potential Biomarkers of Idiopathic Pulmonary Fibrosis
Source: MDPI journal article supplement (doi:10.3390/ijms21228812), 2020-11-20
Supplement: s1 [file s1]

## SUPPLEMENTARY DATA

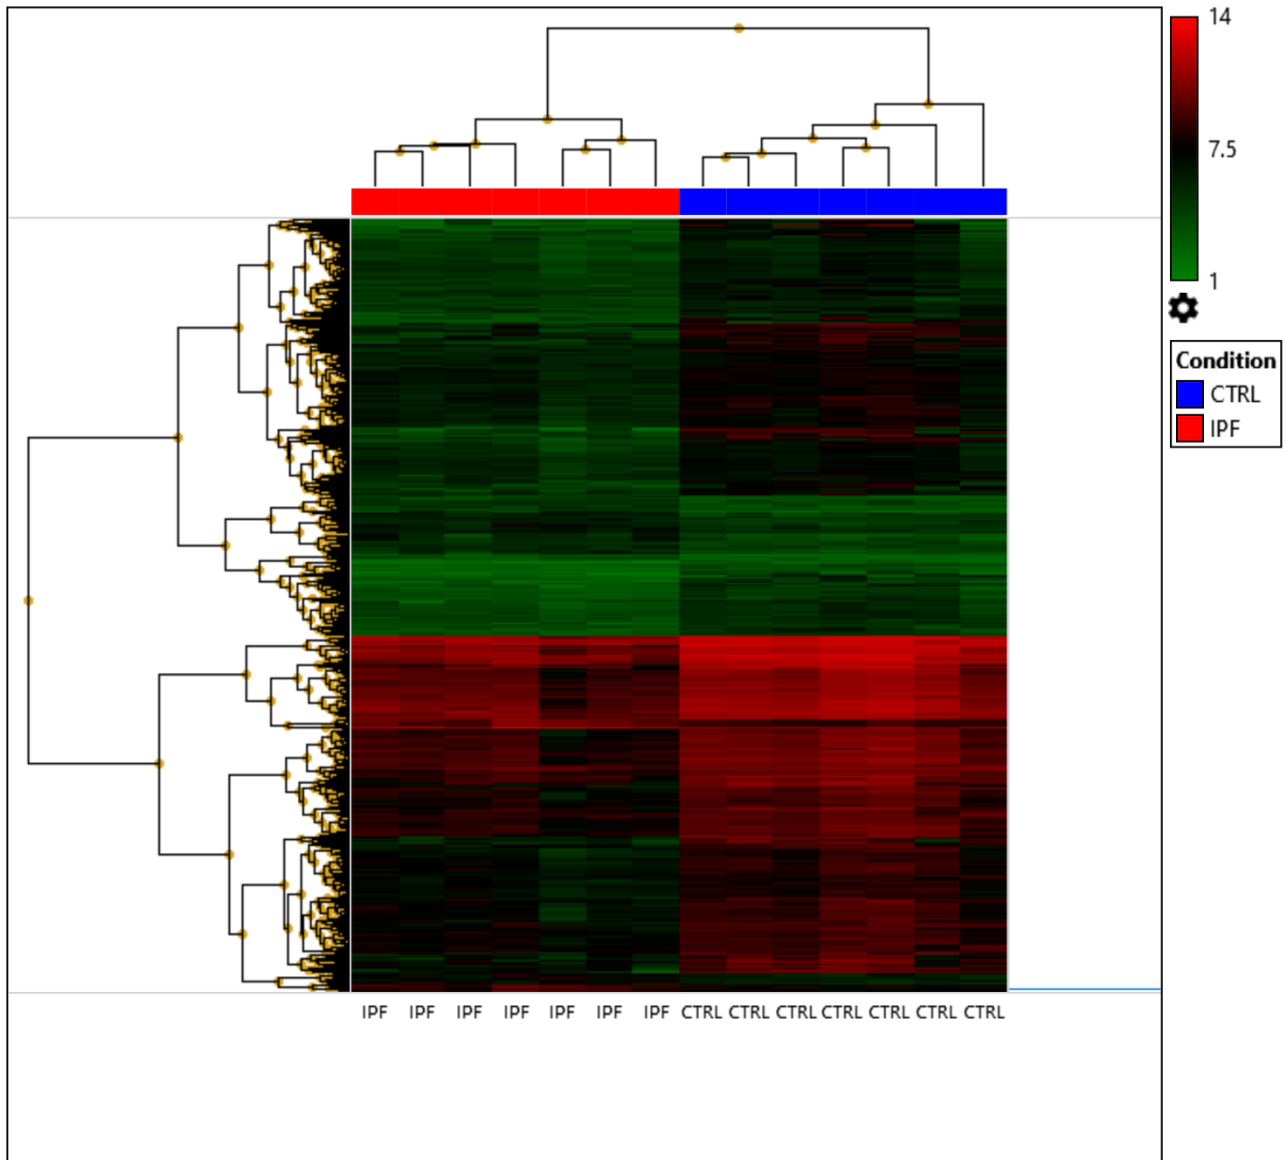

**Supplementary figure 1: Hierarchical clustering of DE transcripts between IPF patients versus Controls.**

Each row represents the relative expression level of a single transcript and each column represents a single analyzed sample. Fold change  $>2.0$  or  $<-2$  and FDR-corrected  $p$ -value  $<0.05$ .
